# Supplementary material for: Type I Diabetes in Zebrafish Reduces Sperm Quality and Increases Insulin and Glucose Transporter Transcripts
Source: MDPI journal article supplement (doi:10.3390/ijms24087035), 2023-04-11
Supplement: s1 [file s1]

**Supplementary Table S1.** Forward and reverse primers used for target genes analysis through quantitative real-time polymerase chain reaction (qPCR).

| Target Gene    | Gene Name                        | Forward Primer (5'-3')    | Reverse Primer (5'-3')        | Annealing Temperature (°C) |
|----------------|----------------------------------|---------------------------|-------------------------------|----------------------------|
| <i>ef1a</i>    | elongation factor 1 alpha        | AGCCCCTCCTGGCTTTCACC<br>C | TGGGACGAAGGCAACACTGG<br>C     | 60                         |
| <i>insa</i>    | preproinsulin                    | CATTCCTCGCCTCTGCTTC       | TGCCTGGGTAGTGCTTACA           | 60                         |
| <i>insra</i>   | insulin receptor a               | TCTACAGCGAGGAAAACAA<br>GC | AGAGATAAGATGCGTCCGTTT<br>T    | 60                         |
| <i>slc2a2</i>  | solute carrier family 2 member 2 | GCCATAACAGCAGGACTACT      | GATGACAGACCACAGTACAA<br>TCC   | 60                         |
| <i>b4galt2</i> | 1,4- galactosyltransferase       | ACCATCTTCTGCCTAGCACC<br>A | GAGTATATTTCCTCGCTTCTGT<br>GAC | 60                         |
| <i>hif1a</i>   | hypoxia-inducible factor-1a      | CAGCCTTTTTGTGAAGGGGC      | TGACTGGAGAAACAGTCCGC          | 60                         |

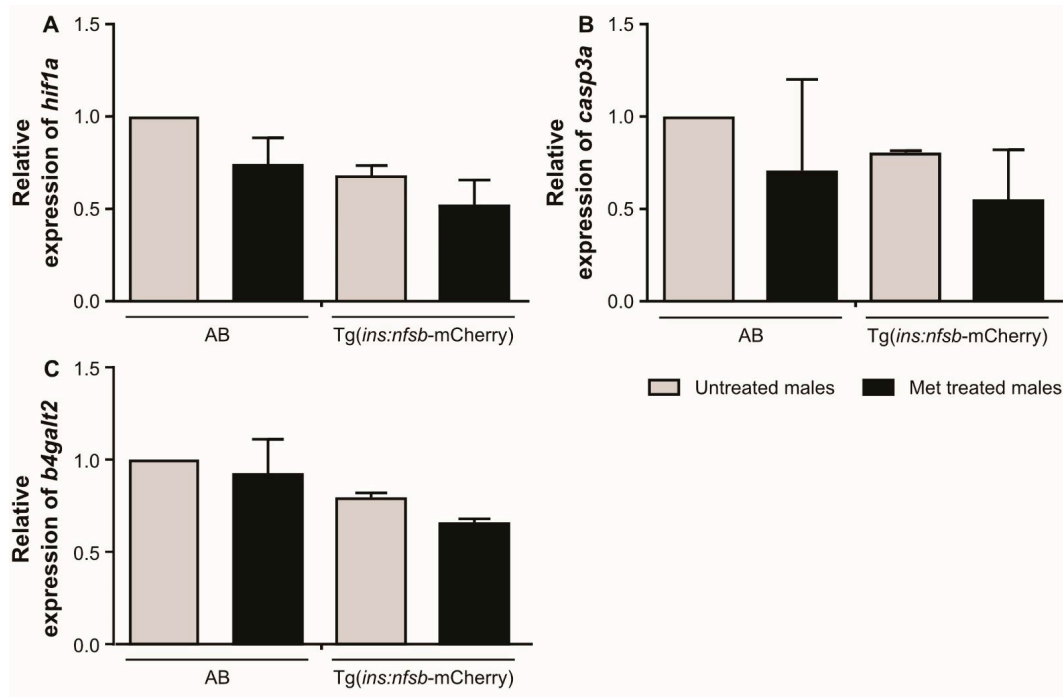

**Supplementary Figure S1.** Genes relative expression to *ef1a* in zebrafish sperm pools using 2- $\Delta\Delta C_t$  method: (A) *hif1a* in spermatozoa pools of AB males in control ( $n = 2$ ) and Met treatment ( $n = 2$ ), and *Tg(ins:nfsb-mCherry)* in control ( $n = 2$ ) and Met treatment ( $n = 2$ ) and (B) *caspase 3a* (*casp3a*) in spermatozoa pools of AB males in control ( $n = 2$ ) and Met treatment ( $n = 2$ ), and *Tg(ins:nfsb-mCherry)* in control ( $n = 2$ ) and Met treatment ( $n = 2$ ) and (C) *b4galt2* in spermatozoa pools of AB males in control ( $n = 2$ ) and Met treatment ( $n = 2$ ), and *Tg(ins:nfsb-mCherry)* in control ( $n = 2$ ) and Met treatment ( $n = 2$ ). The values plotted represent means  $\pm$  SD.

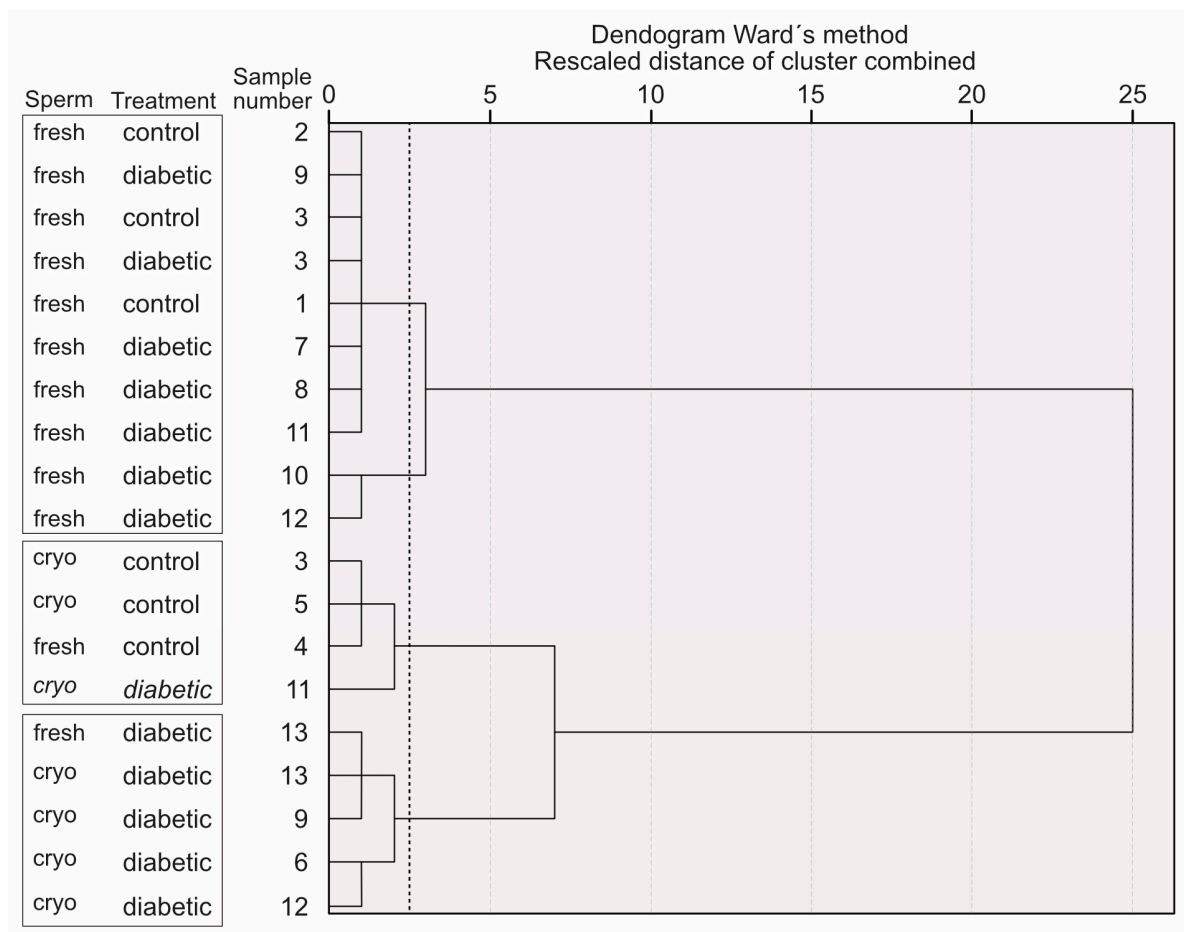

**Supplementary Figure S2.** Dendrogram of Ward's hierarchical cluster analysis for fresh and cryopreserved sperm (of principal components resulting from motility and DNA fragmentation data) of zebrafish sperm cryopreserved with a  $-10^{\circ}\text{C}/\text{min}$  cooling rate. Rectangles discriminate clusters of samples within fresh and cryopreserved sperm from untreated and Met treated *Tg(ins:nfsb-mCherry)* males.
